# Supplementary material
Source: MDPI journal article supplement (https://www.mdpi.com/1999-4893/13/12/325)

Supplement A

# Detailed methodology for deriving a marginal Beta distribution from expert opinion of risk impact on cost and schedule.

**Step 1:** Define the root causes of a risk factor ( $N_i$ ) and the possible scenarios for each root cause.

**Step 2:** For each root cause or scenario ( $M_i$ ), subjectively evaluate the frequency of occurrence and adverse consequence using the corresponding fuzzy membership function.

**Step 3:** Using Equation 3, form a fuzzy relationship between the adverse consequence and frequency of occurrence for each root cause/scenario.

$$\mu_R(x_i, y_i) = \min[\mu_F(x_i), \mu_C(y_i)] \quad (3)$$

where  $x_i$  = an element of universe X

$y_i$  = an element of universe Y;

$\mu_R(x_i, y_i)$  = the membership value of element  $(x_i, y_i)$  in the fuzzy relation R

$\min$  = the minimum values of both elements  $x_i$  and  $y_i$

$\mu_F(x_i)$  = the membership value of element  $x_i$  in fuzzy set F

$\mu_C(y_i)$  = the membership value of element  $y_i$  in fuzzy set C.

**Step 4:** Using Equations 4 and 5, develop a fuzzy union matrix between all relationships.

$$\mu_{SUZ}(x_i, y_i) = \max[\mu_s(x_i, y_i), \mu_z(x_i, y_i)] \quad (4)$$

where  $\max$  = the maximum value of both relations  $s$  and  $z$ .

Union U, between the fuzzy relation matrices R (F, C), is then computed as:

$$U = \max [(F_1 \times C_1) \cup (F_2 \times C_2) \cup (F_3 \times C_3) \dots \dots \dots \cup (F_k \times C_k)] \quad (5)$$

where  $\max$  = the maximum value of the two relations.

**Step 5:** Define the minimum and maximum (A, B) values for the risk impact.

**Step 6:** Divide the impact range (between minimum and maximum) into equal subsets.

**Step 7:** Evaluate the mapping value of each range (example provided as follows):

|                |              |      |      |      |      |               |      |      |      |      |              |      |      |      |     |
|----------------|--------------|------|------|------|------|---------------|------|------|------|------|--------------|------|------|------|-----|
| Impact range   | Small impact |      |      |      |      | Medium impact |      |      |      |      | Large impact |      |      |      |     |
| Impact value   | 10           | 12.5 | 15.0 | 17.5 | 20.0 | 20.0          | 22.5 | 25.0 | 27.5 | 30.0 | 30.0         | 32.5 | 35.0 | 37.5 | 40  |
| Mapping degree | 1.0          | 0.9  | 0.8  | 0.7  | 0.6  | 0.7           | 0.85 | 1.0  | 0.85 | 0.7  | 0.5          | 0.7  | 0.8  | 0.9  | 1.0 |

**Step 8:** Using Equation 3, form a fuzzy relationship between the adverse consequence of a root cause/scenario and the range of a risk impact.

$$\mu_R(x_i, y_i) = \min[\mu_F(x_i), \mu_C(y_i)] \quad (3)$$

where  $x_i$  = an element of universe X

$y_i$  = an element of universe Y;

$\mu_R(x_i, y_i)$  = the membership value of element  $(x_i, y_i)$  in the fuzzy relation R

$\min$  = the minimum values of both elements  $x_i$  and  $y_i$

$\mu_F(x_i)$  = the membership value of element  $x_i$  in fuzzy set F

$\mu_C(y_i)$  = the membership value of element  $y_i$  in fuzzy set C.

**Step 9:** Using Equations 4 and 5, develop a fuzzy union matrix between all relationships in Step 8.

$$\mu_{S \cup Z}(x_i, y_i) = \max[\mu_s(x_i, y_i), \mu_z(x_i, y_i)] \quad (4)$$

where  $\max$  = the maximum value of both relations  $s$  and  $z$ .

Union U, between the fuzzy relation matrices R (F, C), is then computed as:

$$U = \max [(F_1 \times C_1) \cup (F_2 \times C_2) \cup (F_3 \times C_3) \dots \dots \dots \cup (F_k \times C_k)] \quad (5)$$

where  $\max$  = the maximum value of the two relations.

**Step 10:** Using Equation 6, develop the fuzzy composition matrix between the fuzzy union matrices developed in Step 4 and Step 9.

$$U \circ V(x_i, z_k) = \max_{y_j} \{ \min[\mu_U(x_i, y_i), \mu_V(y_j, z_k)] \} \quad (6)$$

where  $U \circ V(x_i, z_k)$  = membership value of element  $(x_i, z_k)$  in composition matrix between U and V

$\mu_U(x_i, y_i)$  = membership value of element  $(x_i, y_i)$  in union matrix U

$\mu_V(y_j, z_k)$  = membership value of element  $(y_j, z_k)$  in union matrix V.

**Step 11:** Using Equations 7 through 9, select one row from the fuzzy composition matrix to calculate the mean and variance of the distribution.

$$P(R_I = z_k) = \frac{\mu_o(z_k)}{\sum_1^m \mu_o(z_k)} \quad (7)$$

$$\mu_I = \sum_{k=1}^m (z_k) * P(R_I = z_k) \quad (8)$$

$$\sigma^2_I = [\sum_{k=1}^m (z_k)^2 * P(R_I = z_k)] - \mu_I^2 \quad (9)$$

where  $R_I$  = risk impact

$z_k$  = element of the risk impact

$P(R_I = z_k)$  = probability of occurrence of the risk impact to be element  $z_k$

$\mu_o(z_k)$  = membership value of element  $z_k$  in subset O  
 $m$  = number of risk impact elements in subset O

**Step 12:** Using the mean and variance, fit the results to a Beta distribution, using Equations 10 and 11, to calculate the shape and scale parameters.

$$\alpha = \frac{\mu_I - A}{B - A} \left[ \frac{(\mu_I - A)(B - \mu_I)}{\sigma^2_I} - 1 \right] \quad (10)$$

$$\beta = \alpha \left[ \frac{B - \mu_I}{\mu_I - A} \right] \quad (11)$$

**Step 13:** Visualize the marginal Beta distribution of cost or schedule impact using the minimum and maximum derived in Step 5 and the scale and shape parameters derived in Step 12 (example of a resulting marginal Beta distribution is provided as follows):

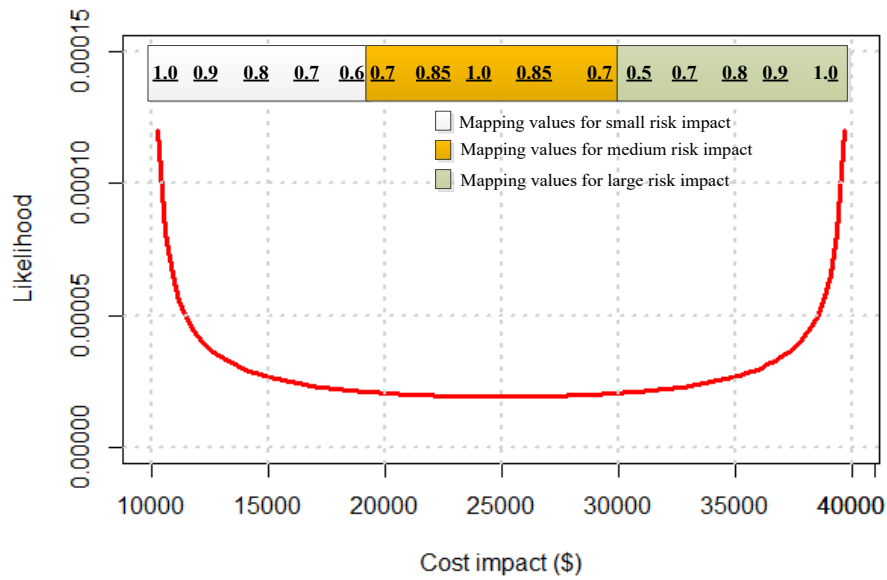

Supplement B

# Derivation of the marginal distribution using *SimphonyProject.NET*

The steps for deriving the marginal distribution in *SimphonyProject.NET*, and a graphical user interface created to make the method easy for analyst lacking expertise in fuzzy logic, are presented as follows:

Step 1:

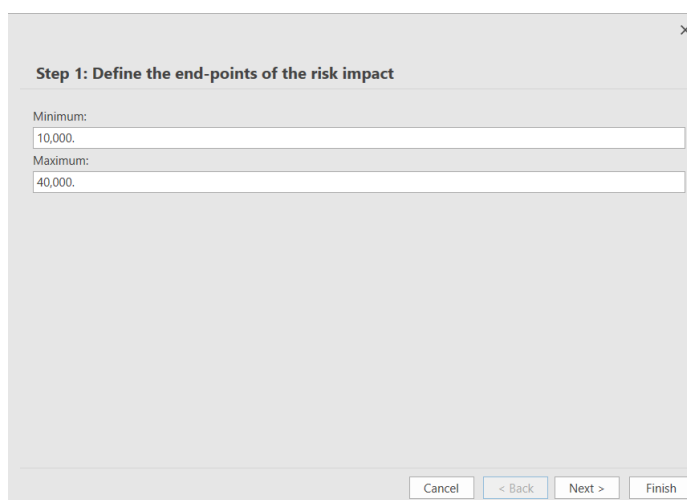

**Step 1: Define the end-points of the risk impact**

Minimum:  
10,000.

Maximum:  
40,000.

Cancel < Back Next > Finish

Step 2:

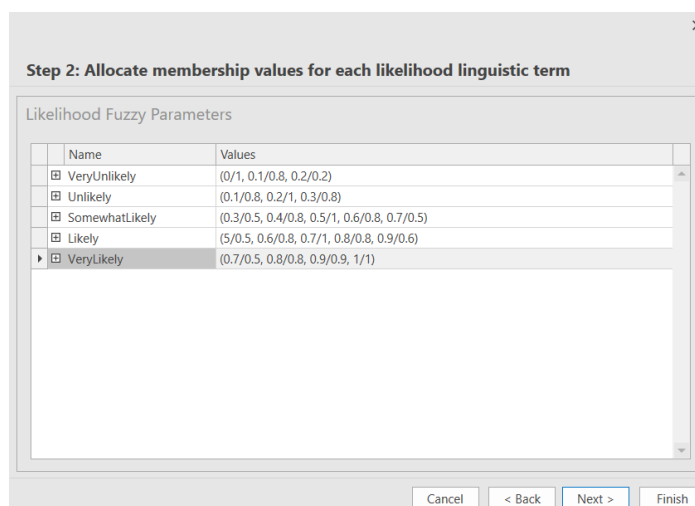

**Step 2: Allocate membership values for each likelihood linguistic term**

Likelihood Fuzzy Parameters

|                                     | Name           | Values                                      |
|-------------------------------------|----------------|---------------------------------------------|
| <input type="checkbox"/>            | VeryUnlikely   | (0/1, 0.1/0.8, 0.2/0.2)                     |
| <input type="checkbox"/>            | Unlikely       | (0.1/0.8, 0.2/1, 0.3/0.8)                   |
| <input type="checkbox"/>            | SomewhatLikely | (0.3/0.5, 0.4/0.8, 0.5/1, 0.6/0.8, 0.7/0.5) |
| <input type="checkbox"/>            | Likely         | (5/0.5, 0.6/0.8, 0.7/1, 0.8/0.8, 0.9/0.6)   |
| <input checked="" type="checkbox"/> | VeryLikely     | (0.7/0.5, 0.8/0.8, 0.9/0.9, 1/1)            |

Cancel < Back Next > Finish

Step 3:

**Step 3: Allocate membership values for each adverse consequence linguistic term**

Consequence Fuzzy Parameters

|                                     | Name      | Values                                      |
|-------------------------------------|-----------|---------------------------------------------|
| <input type="checkbox"/>            | VerySmall | (0/1, 0.1/0.81, 0.2/0.25)                   |
| <input type="checkbox"/>            | Small     | (0/1, 0.1/0.9, 0.2/0.5)                     |
| <input type="checkbox"/>            | Medium    | (0.3/0.2, 0.4/0.8, 0.5/1, 0.6/0.8, 0.7/0.2) |
| <input type="checkbox"/>            | Large     | (0.8/0.5, 0.9/0.9, 1/1)                     |
| <input checked="" type="checkbox"/> | VeryLarge | (0.8/0.25, 0.9/0.81, 1/1)                   |

Cancel < Back Next > Finish

Step 4:

**Step 4: Allocate membership values for each risk impact range**

Impact Range Parameters

|                                     | Name   | Values                                                |
|-------------------------------------|--------|-------------------------------------------------------|
| <input type="checkbox"/>            | Small  | (10000/0.2, 12500/0.7, 15000/1, 17500/0.6, 20000/0.4) |
| <input type="checkbox"/>            | Medium | (20000/0.2, 22500/0.1, 25000/0, 27500/0, 30000/0)     |
| <input checked="" type="checkbox"/> | Large  | (30000/0, 32500/0, 35000/0, 37500/0, 40000/0)         |

Cancel < Back Next > Finish

Step 5:

**Step 5: Identify and assess the root causes of a risk factor**

Root Causes

| Fuzzy Parameter               | Likelihood     | Consequence |
|-------------------------------|----------------|-------------|
| Construction noise is low     | Likely         | VerySmall   |
| Construction noise is medium  | Likely         | Large       |
| Construction noise is high    | Unlikely       | Large       |
| Harm to activities is low     | Unlikely       | Small       |
| Harm to activities is medium  | SomewhatLikely | Large       |
| Harm to activities is high    | Unlikely       | VeryLarge   |
| Traffic disturbance is low    | VeryLikely     | VerySmall   |
| Traffic disturbance is medium | SomewhatLikely | Large       |
| Traffic disturbance is high   | Unlikely       | VeryLarge   |
| Poor communication            | Unlikely       | Medium      |

Cancel < Back Next > Finish

Step 6:

**Step 6: Mapping the adverse consequence of root causes to the overall risk impact**

| Consequence | Impact |
|-------------|--------|
| VerySmall   | Small  |
| Small       | Small  |
| Medium      | Medium |
| Large       | Large  |
| VeryLarge   | Large  |
| *           |        |

Buttons: Cancel < Back Next > Finish

Step 7:

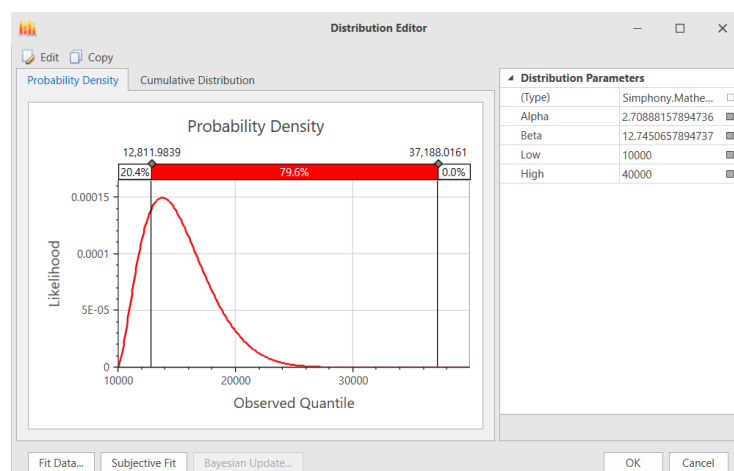

Supplement: s1 [file s1]
